# Supplementary material
Source: PubMed Central journal article supplement (PMC4440445)
Supplement: thnov05p0890s1.pdf [file thnov05p0890s1.pdf]

## **Site-Specific Drug-Releasing Polypeptide Nanocarriers Based on Dual-pH Response for Enhanced Therapeutic Efficacy against Drug-Resistant Tumors**

Yaqiong Dong<sup>1,2,\*</sup>, Jun Yang<sup>1,\*</sup>, Hongmei Liu<sup>1,3</sup>, Tianyou Wang<sup>4</sup>, Suoqin Tang<sup>5</sup>, Jinchao Zhang<sup>2,✉</sup> and Xin Zhang<sup>1,✉</sup>

1. National Key Laboratory of Biochemical Engineering, Institute of Process Engineering, Chinese Academy of Sciences, Beijing, 100190, China

2. College of Chemistry & Environmental Science, Chemical Biology Key Laboratory of Hebei Province, Key Laboratory of Medicinal Chemistry and Molecular Diagnosis of the Ministry of Education, Hebei University, Baoding, 071002, China

3. University of Chinese Academy of Sciences, Beijing, 100049, China

4. Capital Institute of Pediatrics, Beijing, 100020, China

5. Department of Pediatrics, The General Hospital of People's Liberation Army, Beijing, 100853, China

\* These authors contributed equally to this work.

✉Corresponding author: [jczhang6970@163.com](mailto:jczhang6970@163.com) or [xzhang@ipe.ac.cn](mailto:xzhang@ipe.ac.cn).

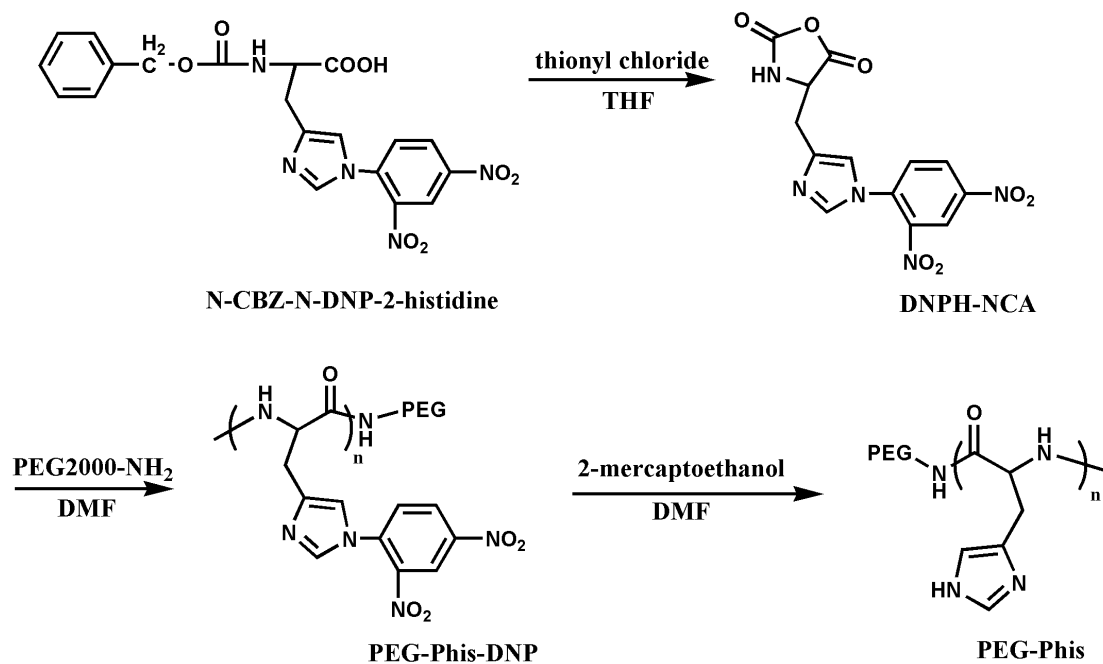

**Figure S1.** Illustration of the synthetic approach of PEG-Phis block polymers.

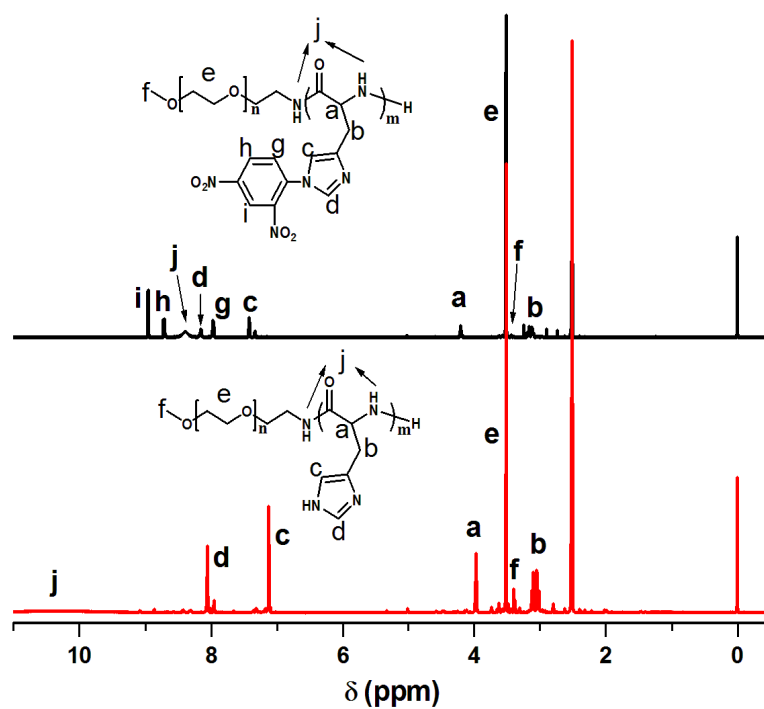

**Figure S2.** The NMR spectra of PEG-Phis-DNP (upper, black color) and PEG-Phis (lower, red color) in DMSO-\$d\_6\$.

**Table S1.** The molecular weights of PEG-Phis block polymers and degree of polymerization (DP) of the polyhistidine block.

| PEG2000:polyhistidine | DP by NMR | Mn*   |
|-----------------------|-----------|-------|
| PEG-Phis20            | 40        | 7600  |
| PEG-Phis40            | 70        | 11800 |
| PEG-Phis60            | 140       | 21600 |
| PEG-Phis80            | 180       | 27200 |

\*Calculated by NMR.

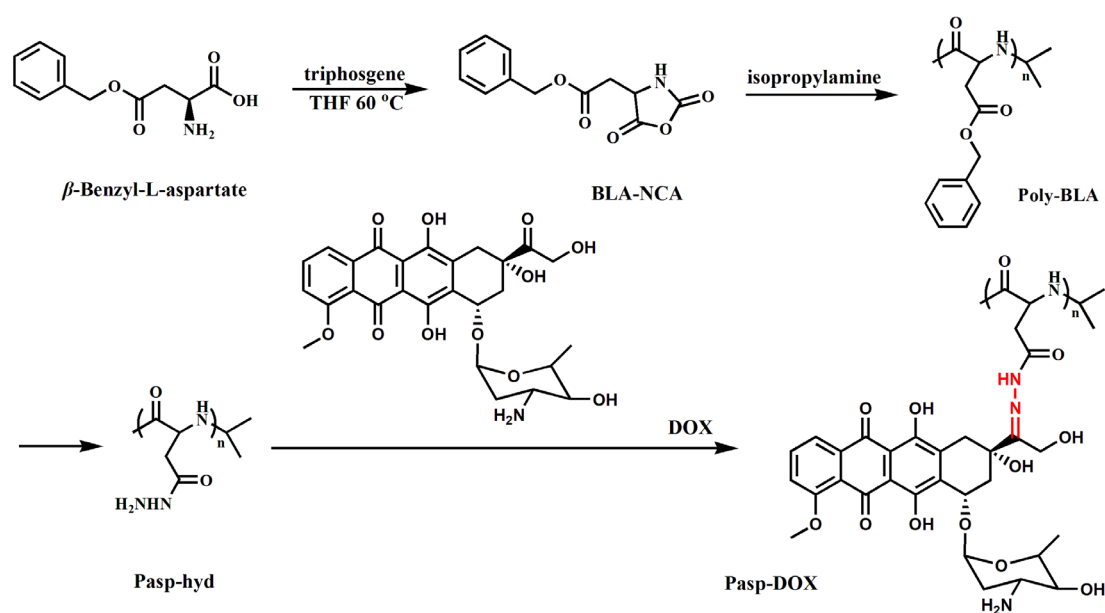

**Figure S3.** Illustration of the synthetic approach of Pasp-DOX. The red linker represented the hydrazone bond, which could sensitive to break at lower pH (5-6).

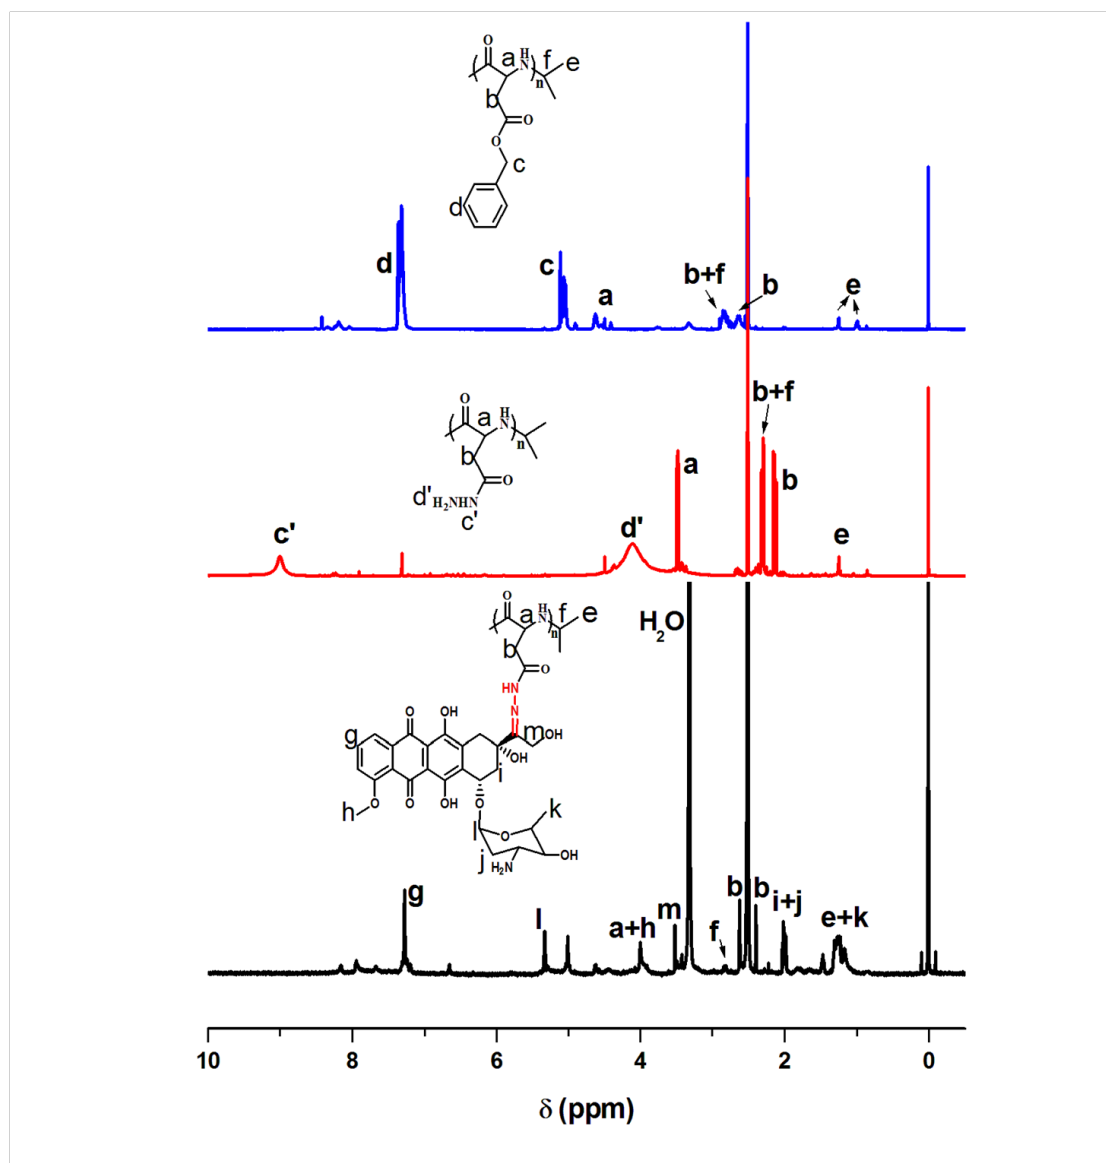

**Figure S4.** The NMR spectra of Pasp-BLA (upper, blue color), Pasp-hyd (middle, red color) and Pasp-DOX (lower, black color) in DMSO-*d*<sub>6</sub>.

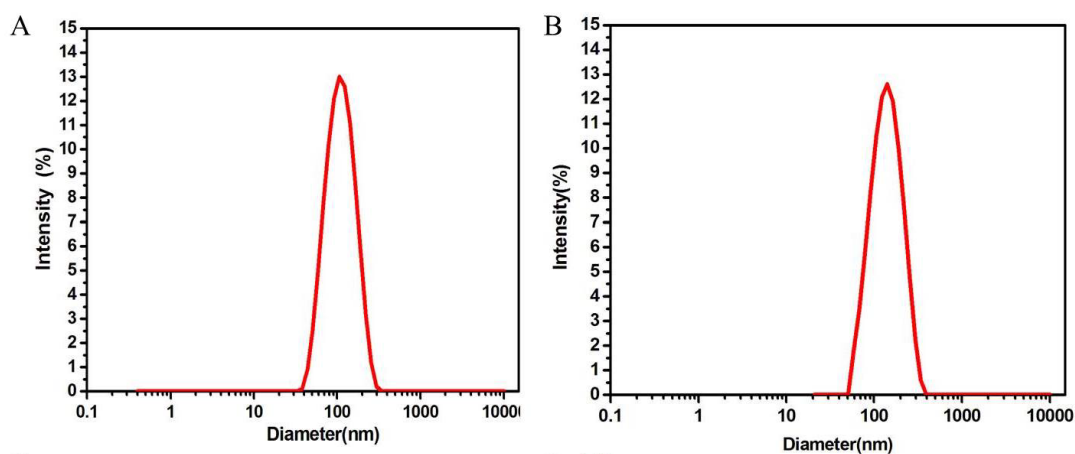

**Figure S5.** Dynamic light scattering analyses of the PEG-Phis60/Pasp-DOX/CA4 nanoparticles (A) and PEG-Phis40/Pasp-DOX/CA4 (B) nanoparticles.

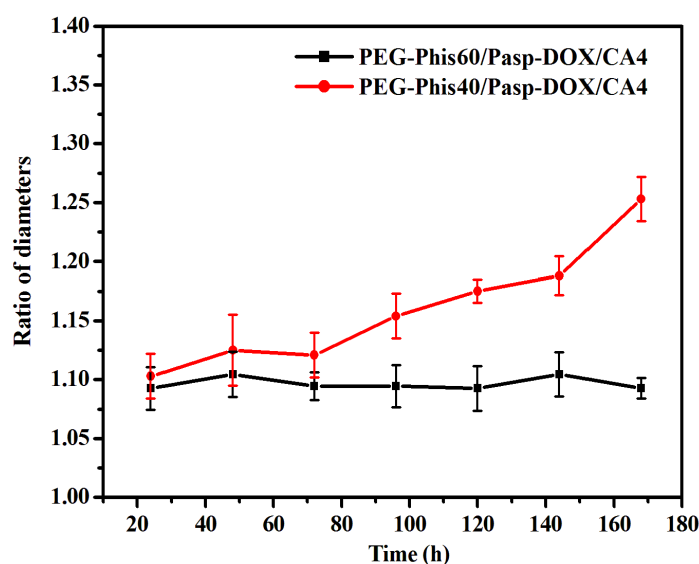

**Figure S6.** Dynamic light scattering analyses of the PEG-Phis60/Pasp-DOX/CA4 nanoparticles and PEG-Phis40/Pasp-DOX/CA4 nanoparticles, which was incubated with 20% FBS for 1 week at 37°C. Data are shown as the mean±S.D. of three independent experiments.

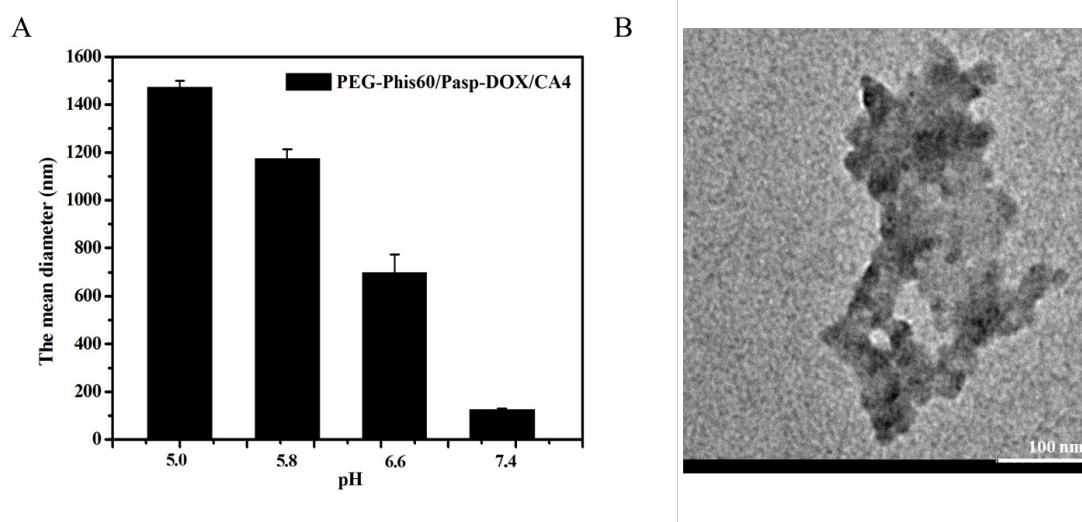

**Figure S7.** A) The particle size change of PEG-Phis60/Pasp-DOX/CA4 in respond to pH change at 37°C for 0.5 h. Data are shown as the mean±S.D. of three independent experiments. B) Transmission electronic microscopic (TEM) images of the PEG-Phis60/Pasp-DOX/CA4 when incubated at pH 5.0 for 0.5 h. The scale bar is 100 nm.

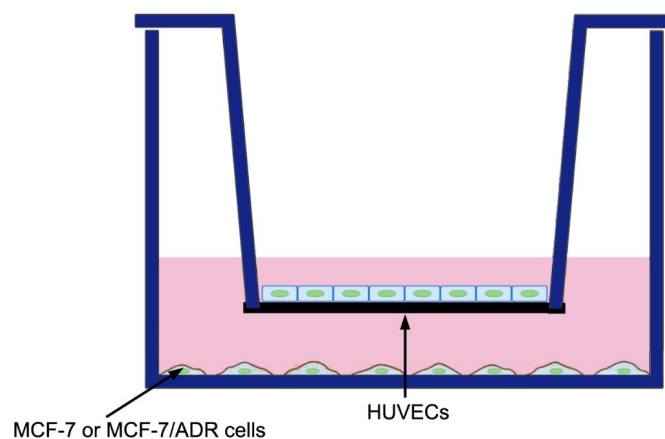

**Figure S8.** Schematic diagram of *in vitro* non-contact co-culture study. HUVECs were cultured in transwell chambers and then placed in the wells above MCF-7 and MCF-7/ADR cells, respectively. After incubation, the co-cultures were exposed to different treatments. The medium should be enough to exchange through the transwell.

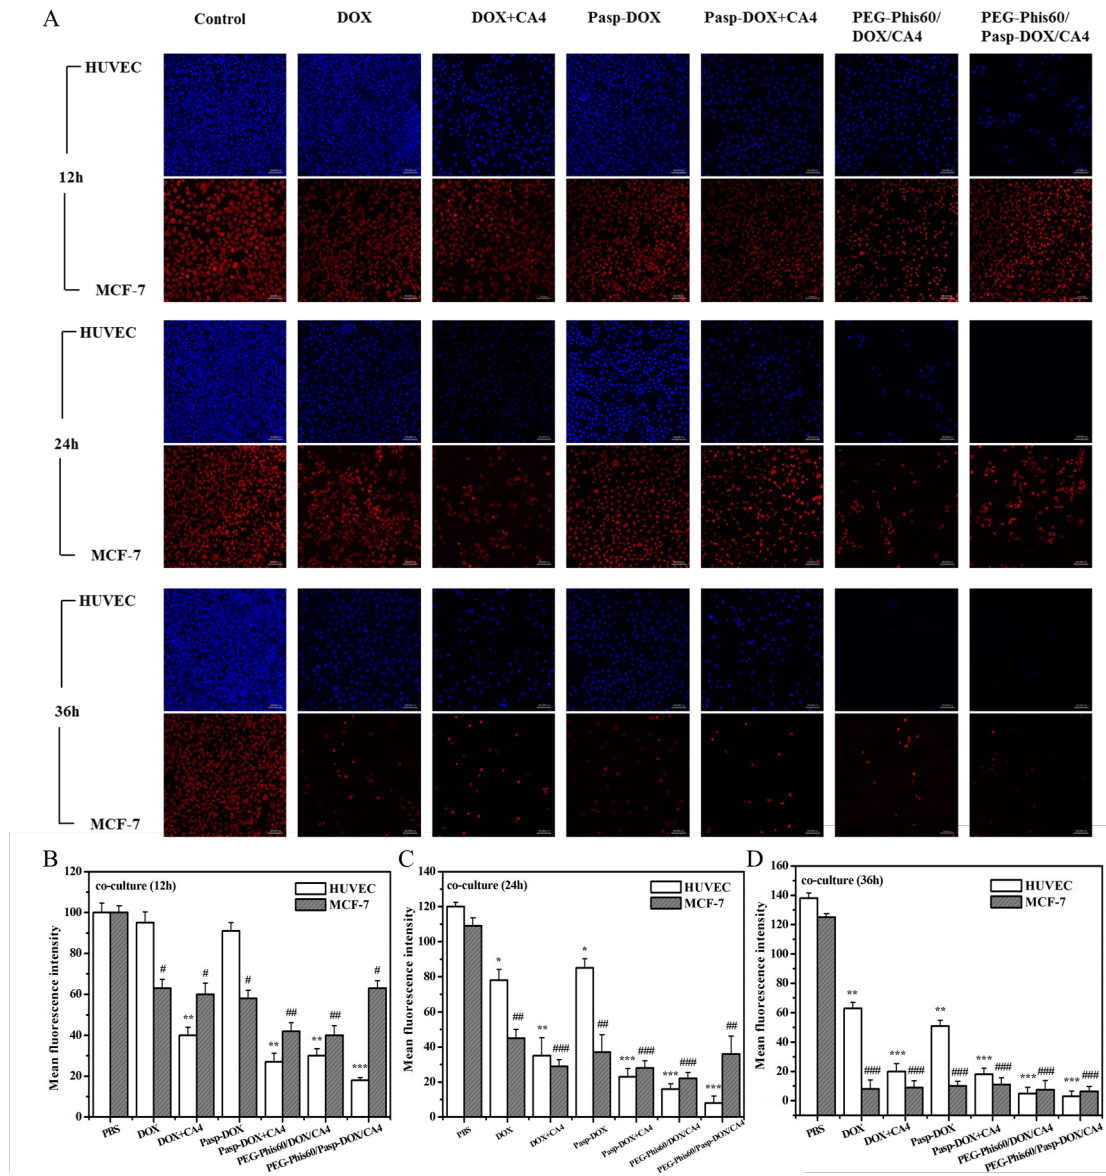

**Figure S9.** *In vitro* non-contact co-culture studies. (A) The co-culture cells were treated with different formulations for 12, 24, and 36 h, respectively. After treatment, the HUVECs and tumor cells MCF-7 were stained with Hoechst 33342 (blue) and propidium iodide (red), respectively. Quantitative analysis of mean fluorescence intensity of the co-culture cells after treated with different formulations for 12 h (B), 24 h (C) and 36 h (D). Results are mean±S.D. of three independent experiments. Statistical significance: \* $P < 0.05$ , \*\* $P < 0.005$  and \*\*\* $P < 0.0005$  versus the MFI of HUVEC cells after 12 h incubation. # $P < 0.05$ , ## $P < 0.005$  and ### $P < 0.0005$  versus the MFI of MCF-7 cells after 12 h incubation. The scale bar was 100  $\mu\text{m}$ .

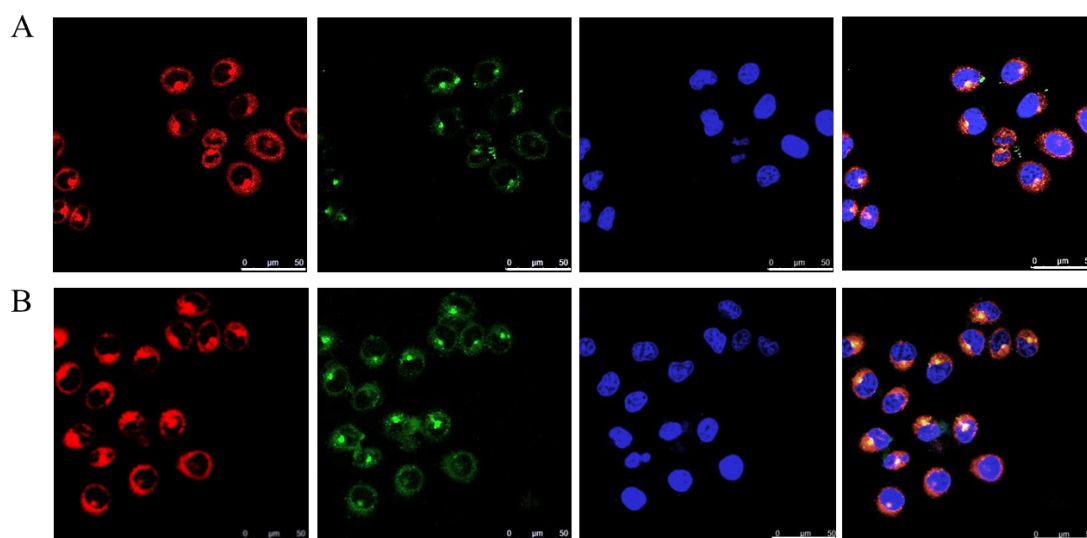

**Figure S10.** Confocal microscopic images of MCF-7 cells after culturing with PEG-Phis60/DOX/CA4 (A) and PEG-Phis60/Pasp-DOX/CA4 (B) for 2 h. Nuclei and lysosomes/endosomes were stained by Hoechst 33342 and LysoTracker Green, respectively. The red signal represented the DOX fluorescence from the nanoparticles (Scale bar: 50  $\mu\text{m}$ ).

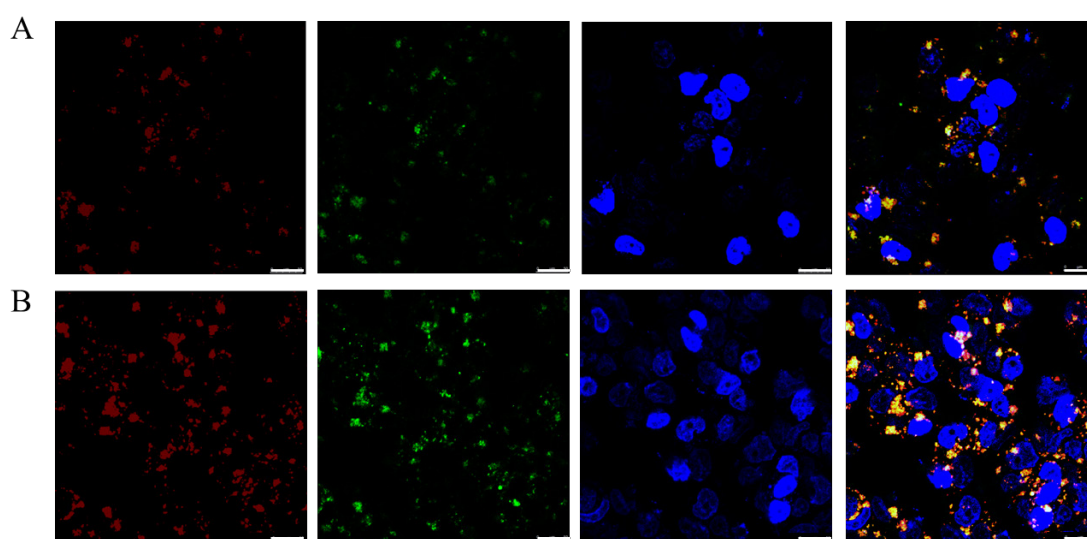

**Figure S11.** Confocal microscopic images of MCF-7/ADR cells after culturing with PEG-Phis60/DOX/CA4 (A) and PEG-Phis60/Pasp-DOX/CA4 (B) for 2 h. Nuclei and lysosomes/endosomes were stained by Hoechst 33342 and LysoTracker Green, respectively. The red signal represented the DOX fluorescence from the nanoparticles (Scale bar: 50  $\mu\text{m}$ ).

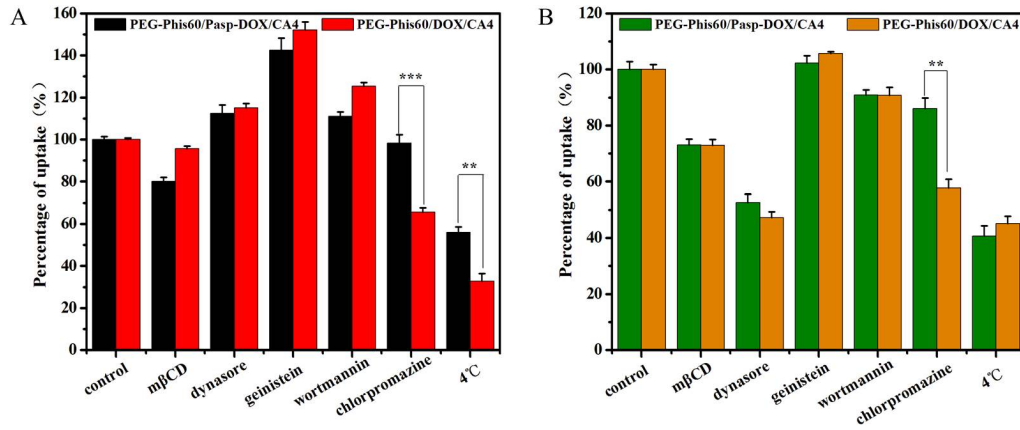

**Figure S12.** Elucidation of the mechanisms underlying cellular uptake of the nanoparticles. MCF-7 cells (A) and MCF-7/ADR cells (B) were treated with PEG-Phis60/DOX/CA4 and PEG-Phis60/Pasp-DOX/CA4 for 2 h in the presence of various endocytic inhibitors, and results were expressed as percentage uptake (%) of control cells which were incubated in the absence of endocytic inhibitors (n=3). Statistical significance: \*P<0.05, \*\*P<0.005 and \*\*\*P<0.0005.

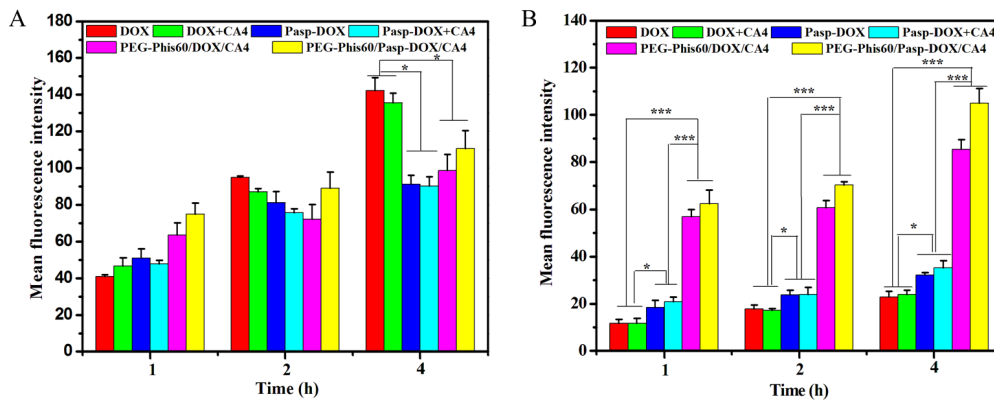

**Figure S13.** The accumulation of DOX in MCF-7 cells (A) and MCF-7/ADR cells (B) after incubation with PEG-Phis60/Pasp-DOX/CA4 at pH 6.6 for 1, 2 and 4 h. Data are shown as the mean±S.D. of three independent experiments. Statistical significance: \*P<0.05, \*\*P<0.005 and \*\*\*P<0.0005.

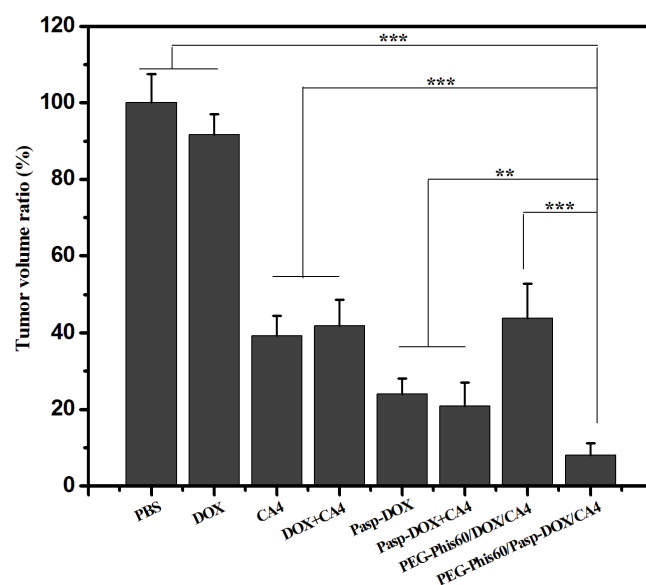

**Figure S14.** The tumor inhibition effect of different treatments of the nude mice bearing MCF-7/ADR tumors at the end of the *in vivo* antitumor experiment. The results were expressed as means±S.D. (n=5). Statistical significance: \*P<0.05, \*\*P<0.005 and \*\*\*P<0.0005.

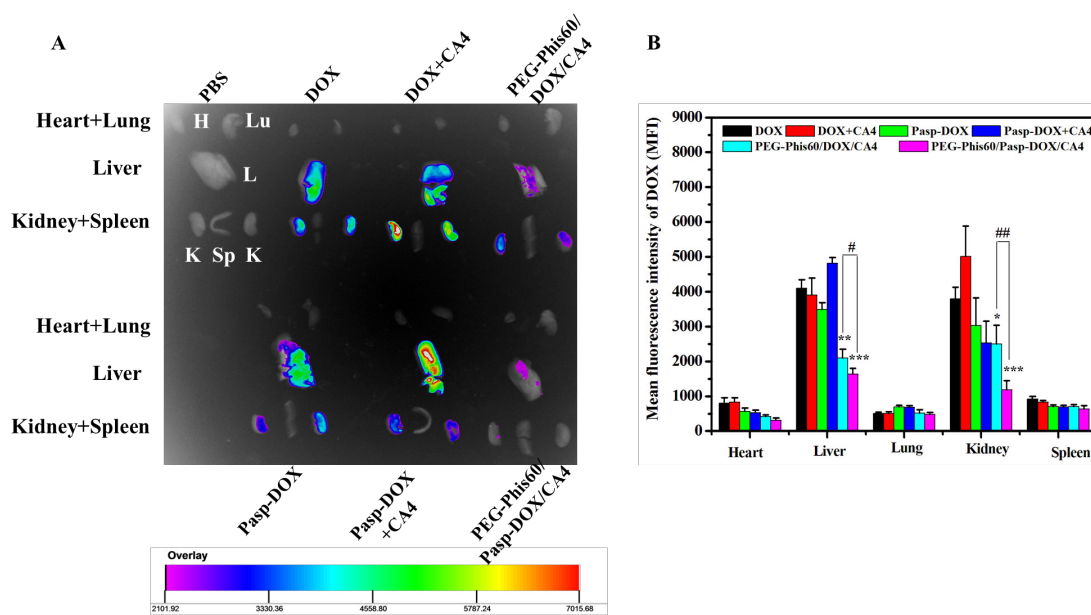

**Figure S15.** A) DOX accumulation in normal organs (heart (H), lung (Lu), liver (L), kidney (K) and spleen (Sp)) after *in vivo* antitumor activity with different formulations at day 16. B) Quantification of mean fluorescence intensity of DOX was calculated. Results are expressed as mean±S.D. (n=5). Statistical significance: \*P<0.05, \*\*P<0.005 and \*\*\*P<0.0005 *versus* the DOX treated group, #P<0.05, ##P<0.005.

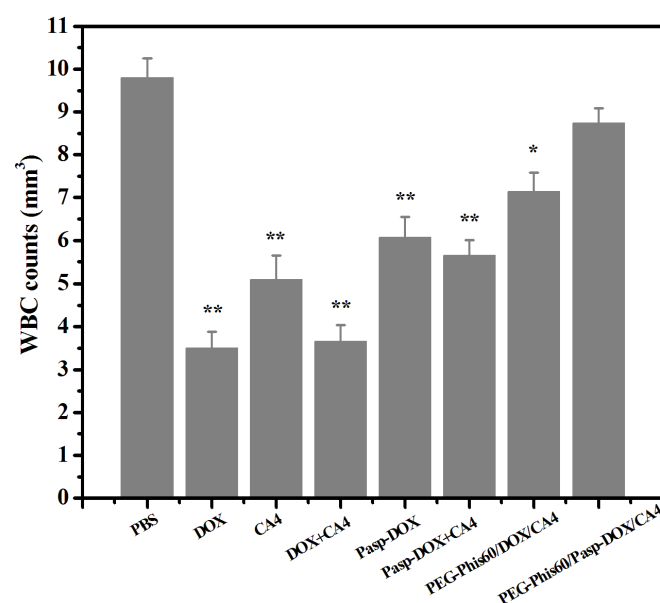

**Figure S16.** Effect of different treatments on the white blood cell (WBC) counts. Results are expressed as means  $\pm$  S.D. (n=5). Statistical significance: \*P<0.05 and \*\*P<0.005 *versus* control.

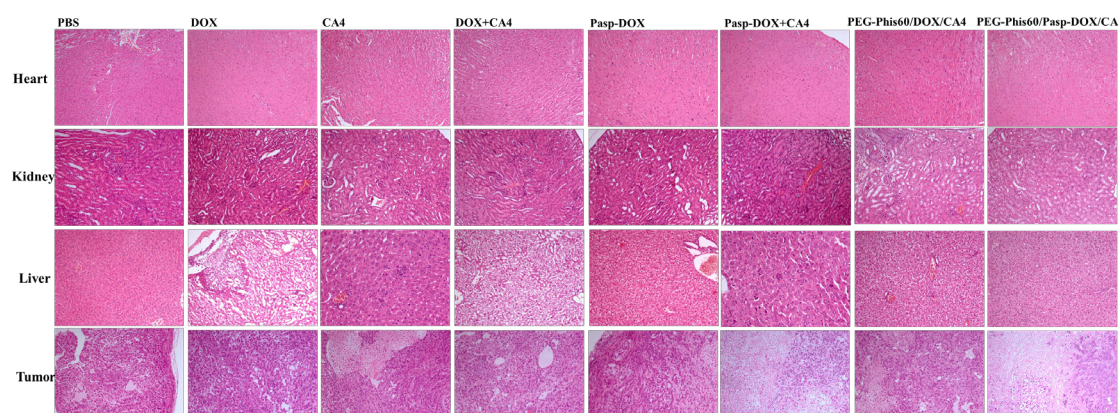

**Figure S17.** Hematoxylin-eosin (H&E) staining examination of heart, kidney, liver and tumor from the treated mice.
